# Supplementary material
Source: HighWire-hosted journal article supplement (doi:10.1101/rna.032631.112)
Supplement: SuppLegends.docx [file SuppLegends.docx]

**Supplemental figure 1:** (***A***) The *EIF3E* mRNA level of the extracts used in Figure 3B were quantified under the same conditions. The graph represents the results obtained in these experiments for the *EIF3E* mRNA indicating its efficient silencing by the I6.1 and I6.3 siRNA duplexes. ***(B)*** Extracts of cells used for experiments shown in Figure 2 were analyzed by immunoblot using antibodies to INT6 (top panel), to MIF4GD (middle panel) and to -actin (bottom panel). ***(C)*** The gel corresponding to the experiment shown in Fig. 2B stained with Coomassie blue is shown.

**Supplemental figure 2:** Flow cytometry analysis of synchronized cells silenced for INT6 and MIF4GD. ***(A, B, C, D)*** Cell cycle profiles ofHeLa cells either non-synchronized (A) or synchronized in S-phase by a double-thymidine block which were transfected with the control (B), I6.1 (C) and *MIG4GD* (D) siRNA duplexes. The M2, M3, and M4 markers correspond to the percentage of cells in G1, S, and G2/M phases, respectively. **(E)** Graph representing the percentage of cells in the G1, S and G2/M phases of the cell cycle for the four experimental conditions.

**Supplemental figure 3:** Colocalization of MIF4GD and SLBP. (***A***) HeLa cells were transfected with the MIF4GDHA expression vector and immunostained with both the rabbit polyclonal antibody to MIF4GD (a) and the monoclonal antibody to HA (b) and representative confocal images are shown, as well as superimpositions of both stainings (c) and of the stainings with the corresponding transmission image (d). An enlargement of the picture corresponding to superimposition of both stainings is also shown (e). Examples of colocalization of MIF4GD and MIF4GDHA are indicated by white arrows. Scale bars 5 m. (***B***) Non-transfected HeLa cells were similarly analyzed by immunostaining with both the antibody to MIF4GD and a monoclonal antibody to SLBP. ***(C)*** Non-transfected HeLa cells were similarly analyzed by immunostaining with an antibody to INT6.
